# Supplementary figures and images for: Intrahost Dynamics of Antiviral Resistance in Influenza A Virus Reflect Complex Patterns of Segment Linkage, Reassortment, and Natural Selection
Source: PubMed Central journal article supplement — mBio. 2015 Apr 7;6(2):e02464-14. doi: 10.1128/mBio.02464-14 (PMC4453542; doi:10.1128/mbio.02464-14), 2015-04-07

Figure S1.

HA

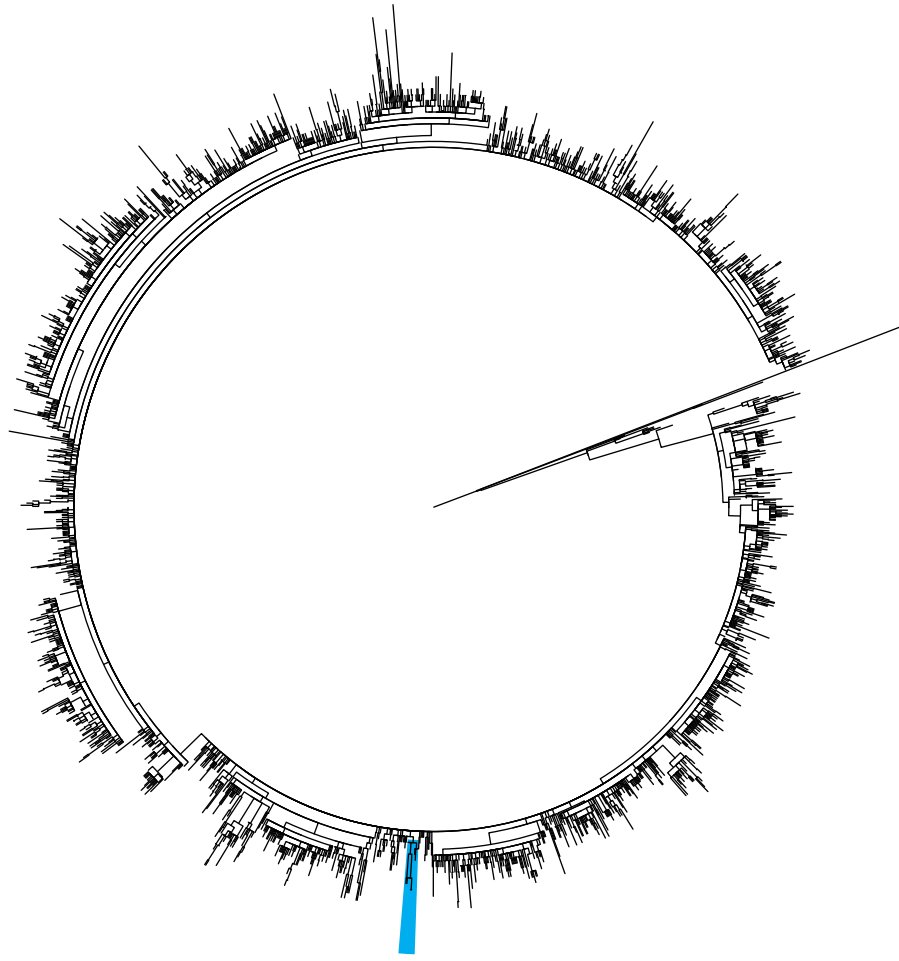

0.02

NA

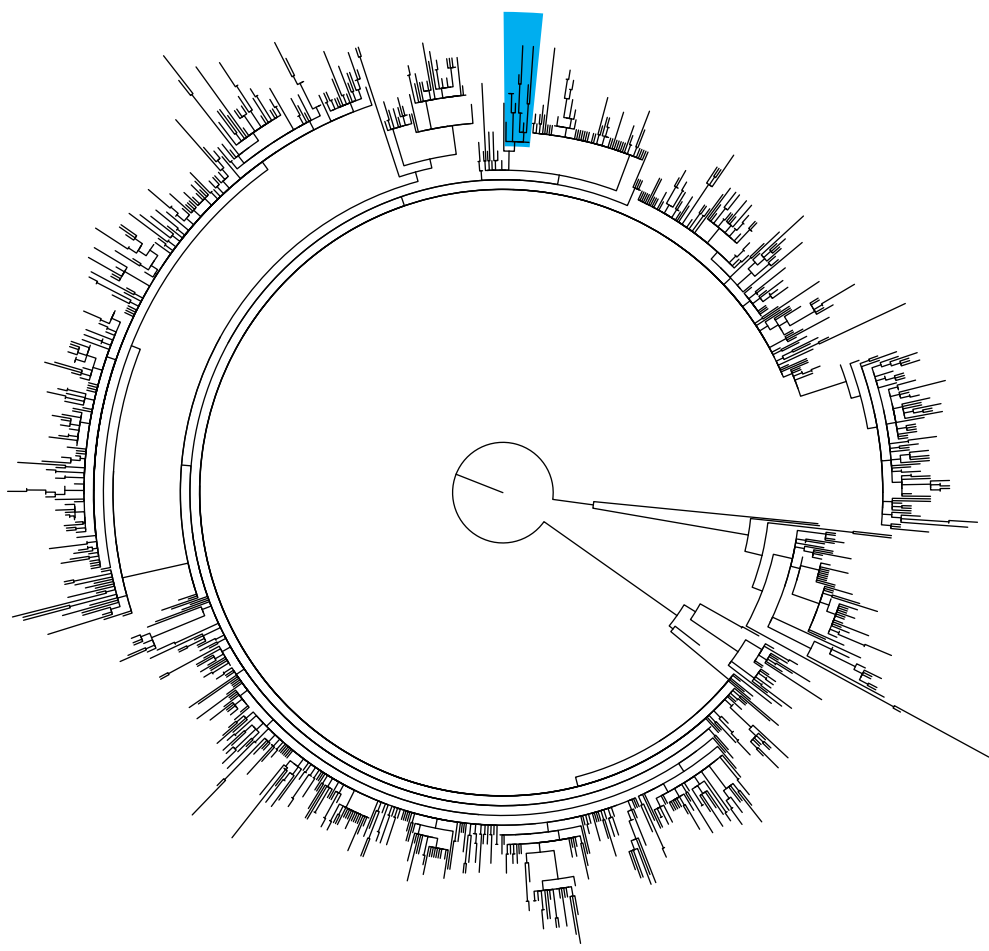

0.0080

Supplement: mbo002152270sf1.pdf [file mbo002152270sf1.pdf]

Figure S2

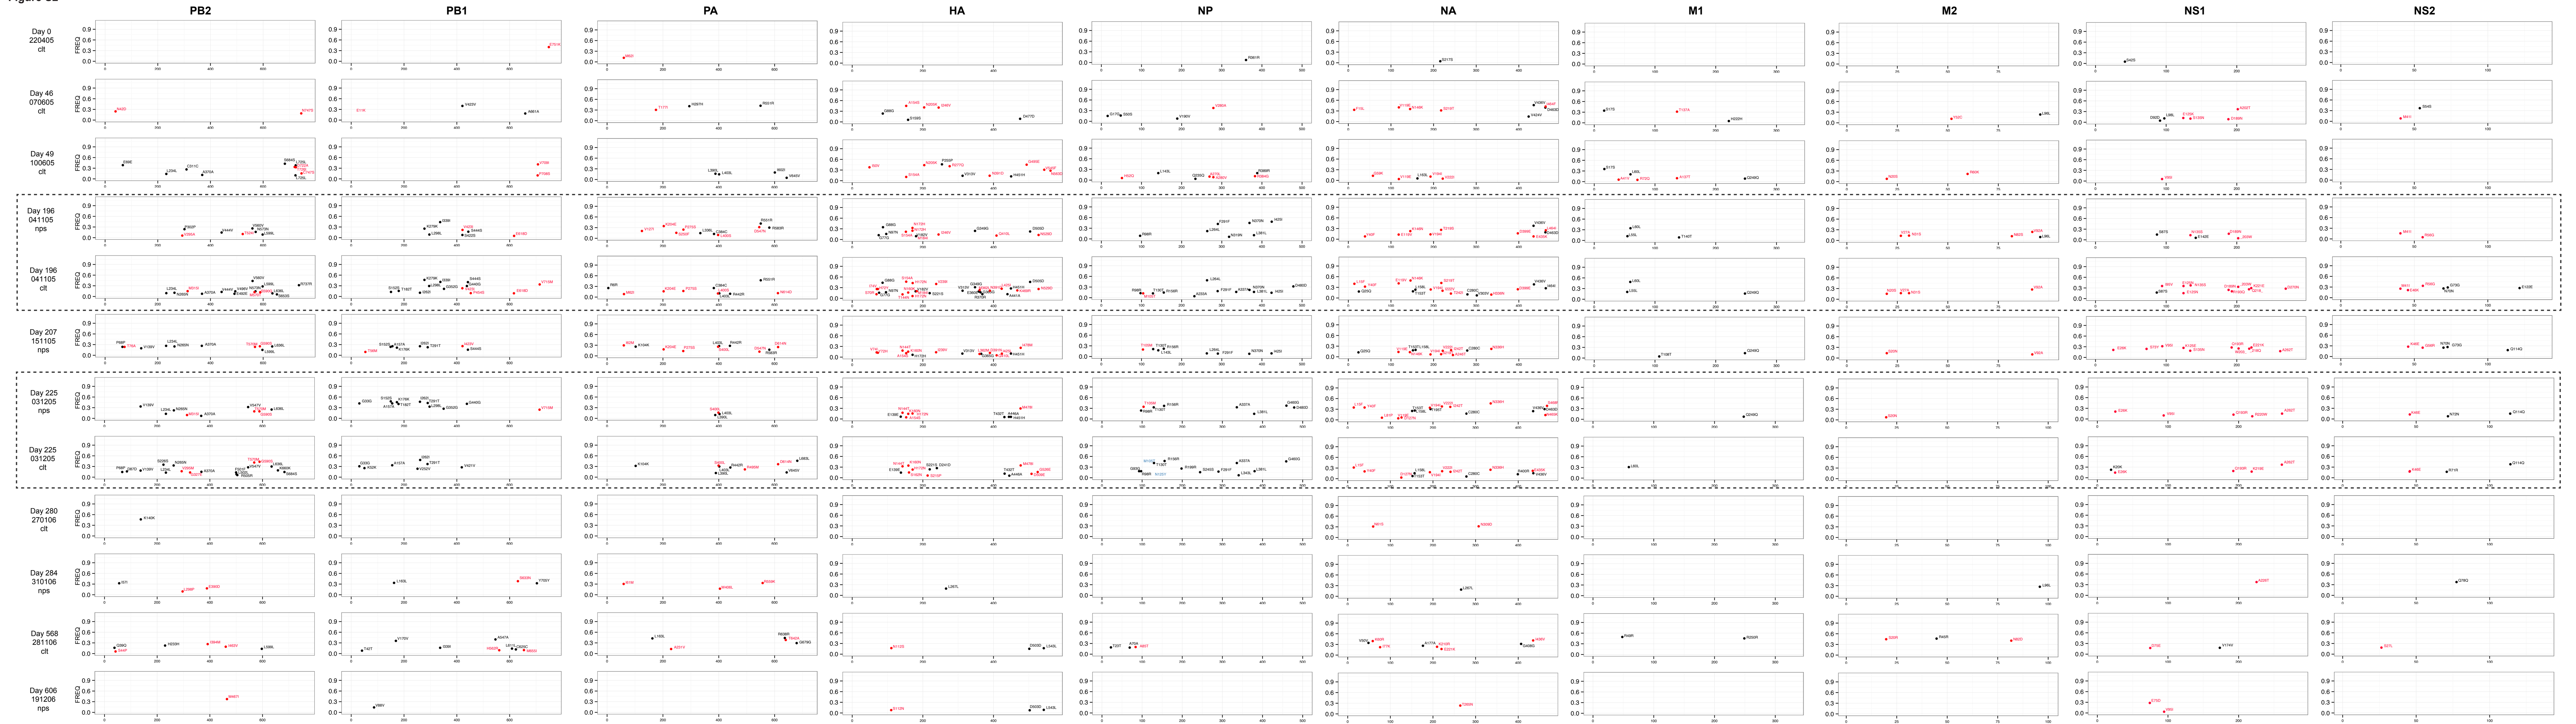

Supplement: mbo002152270sf2.pdf [file mbo002152270sf2.pdf]

Figure S3.

HA

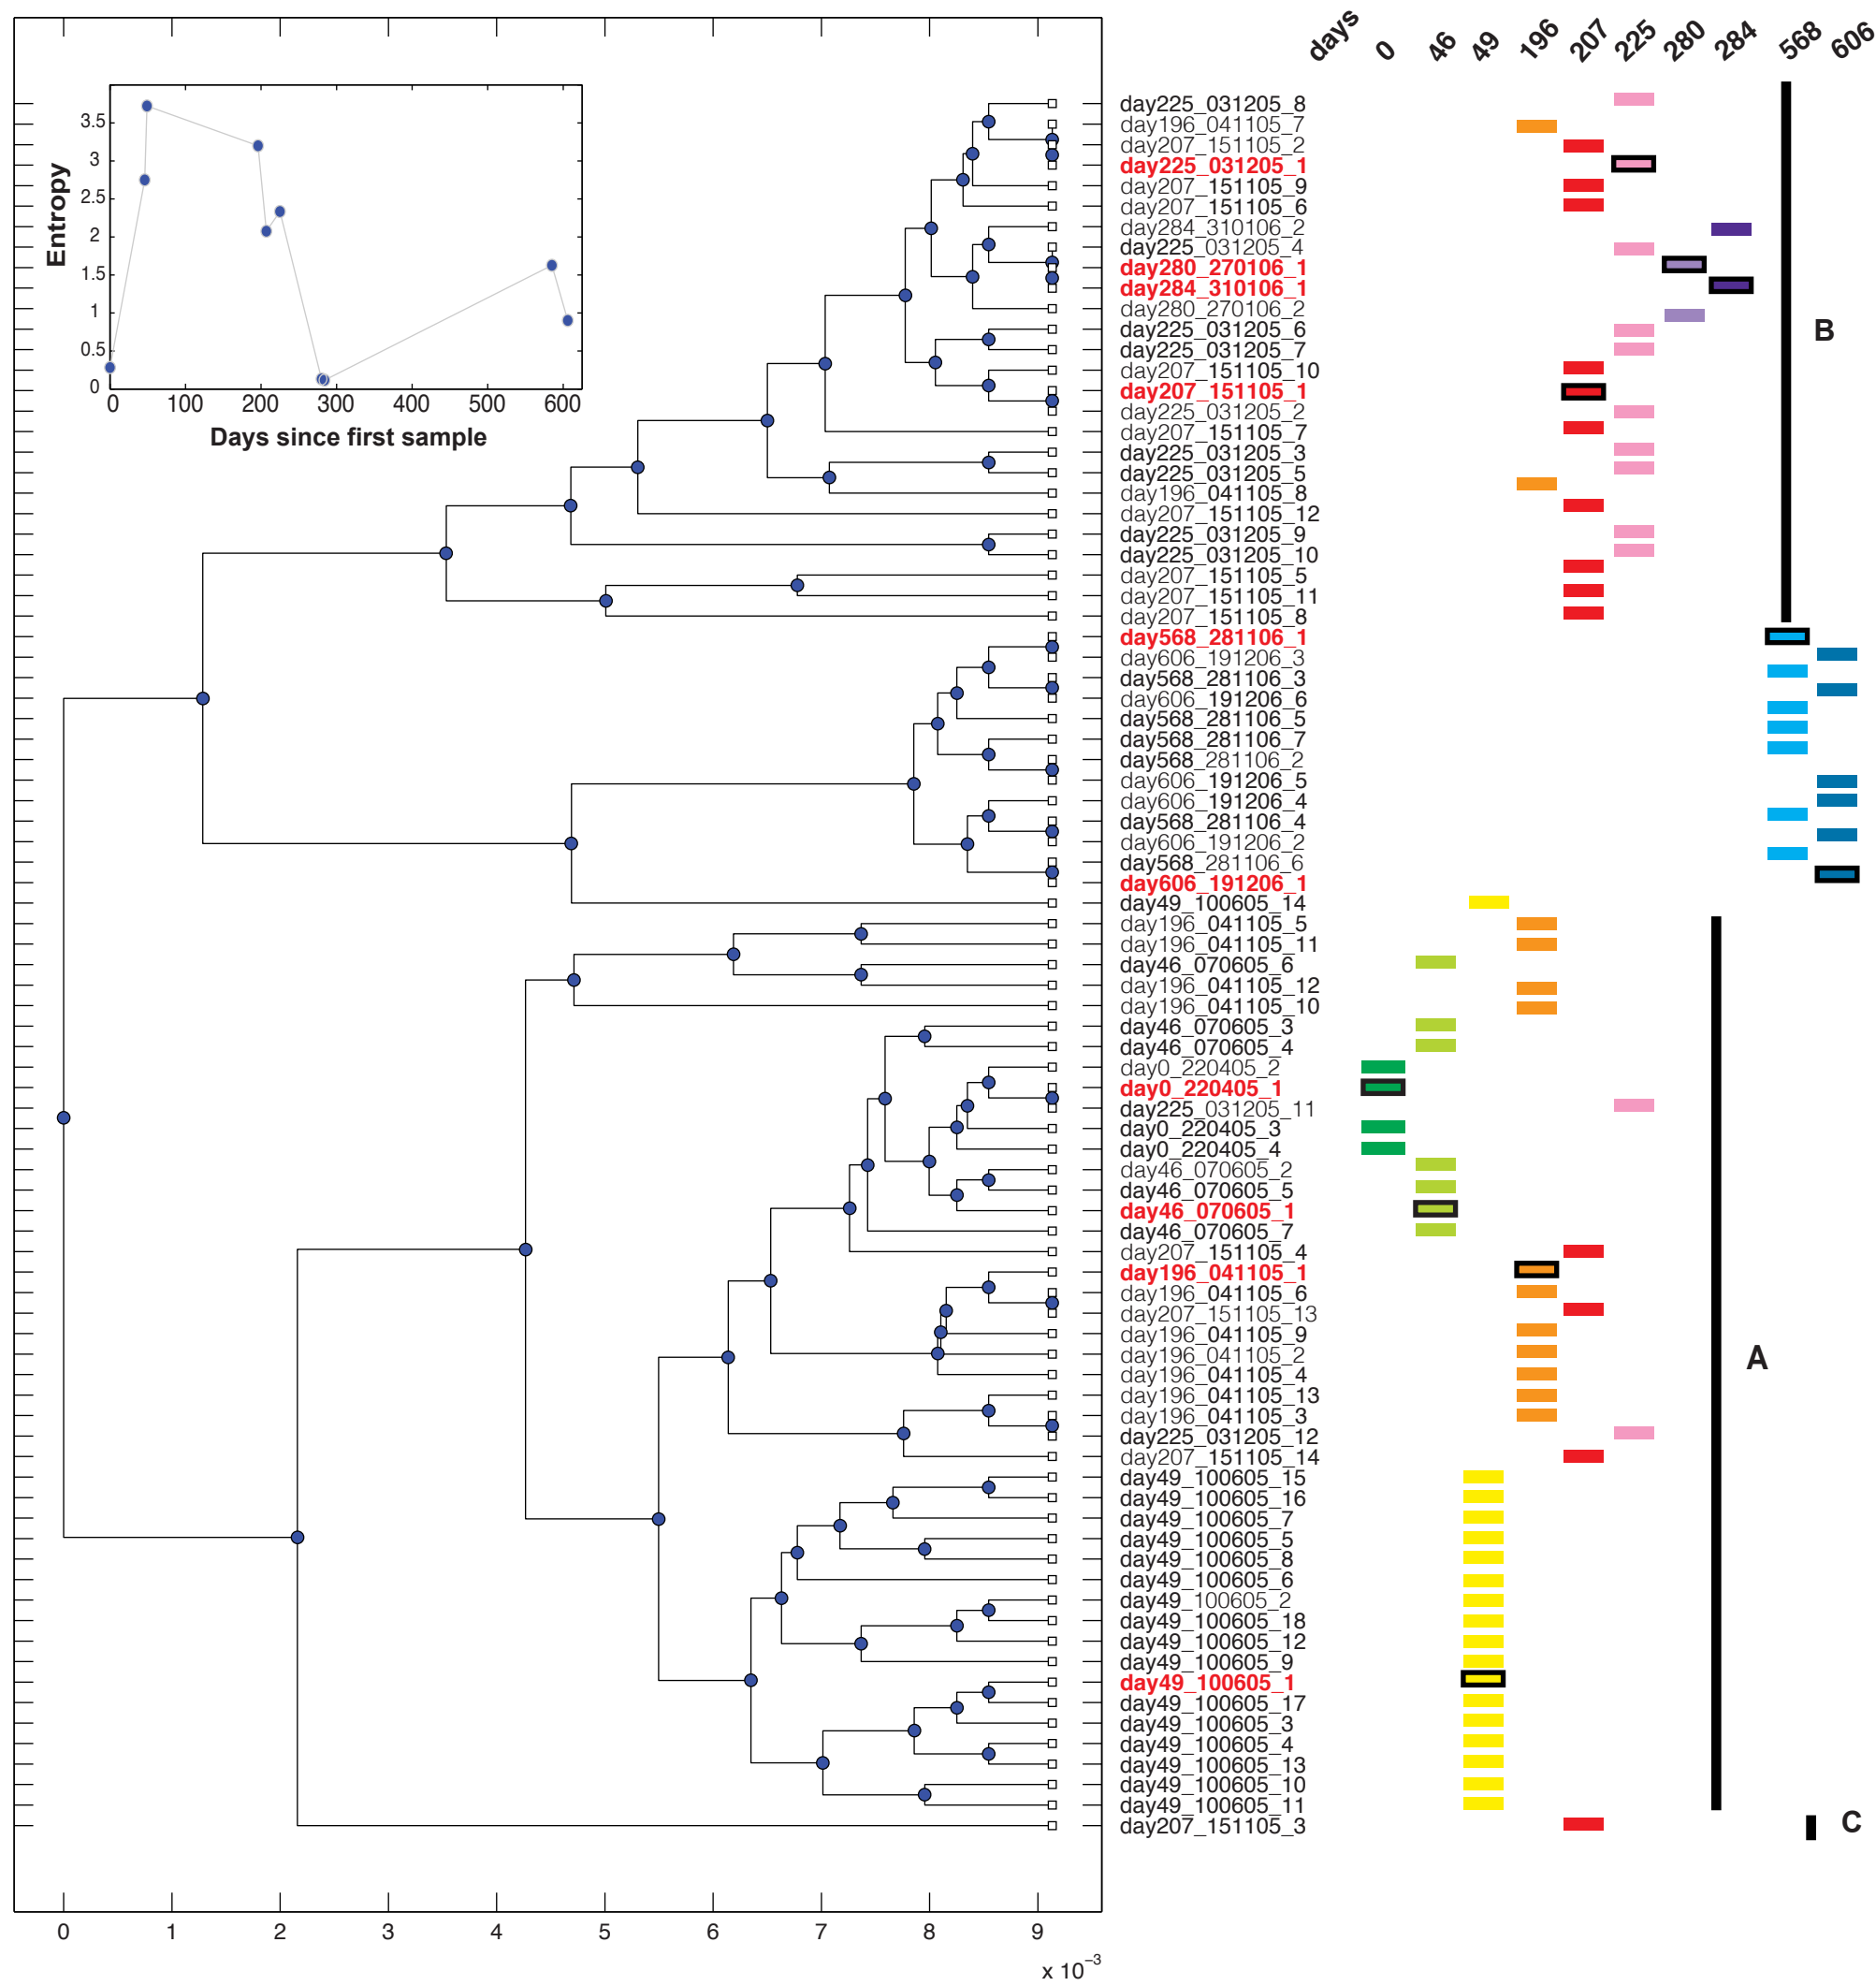

M

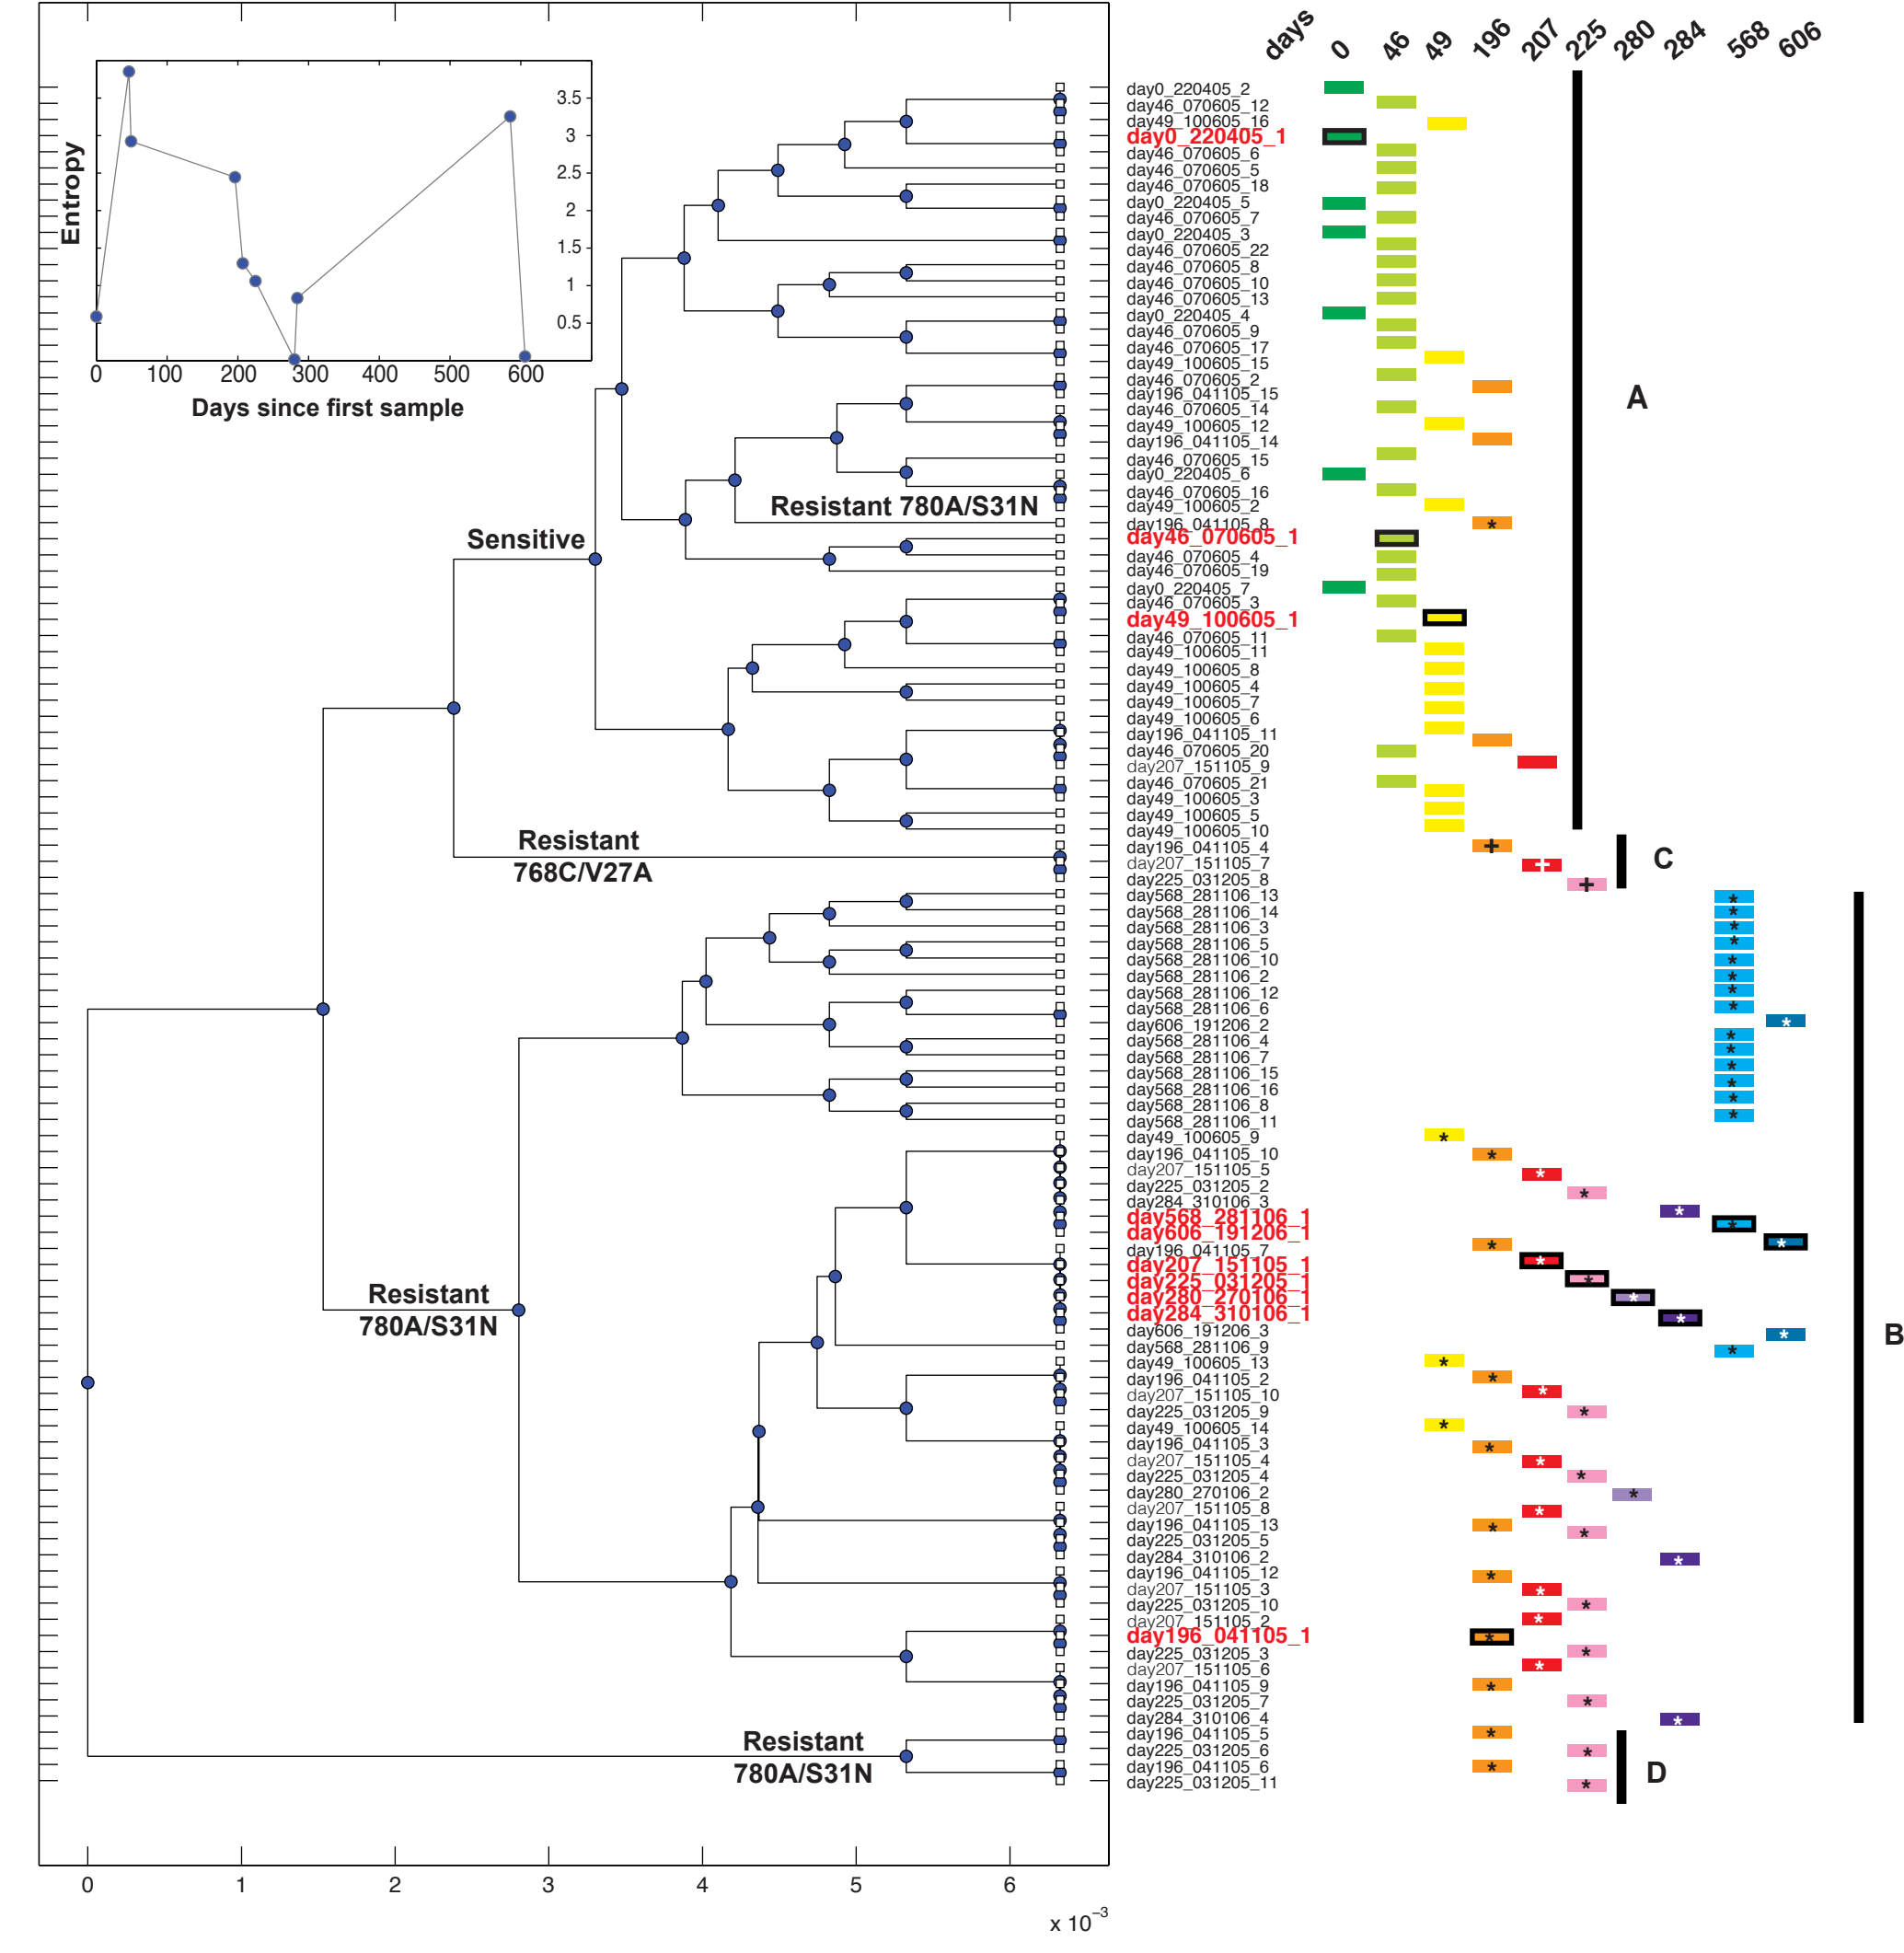

NA

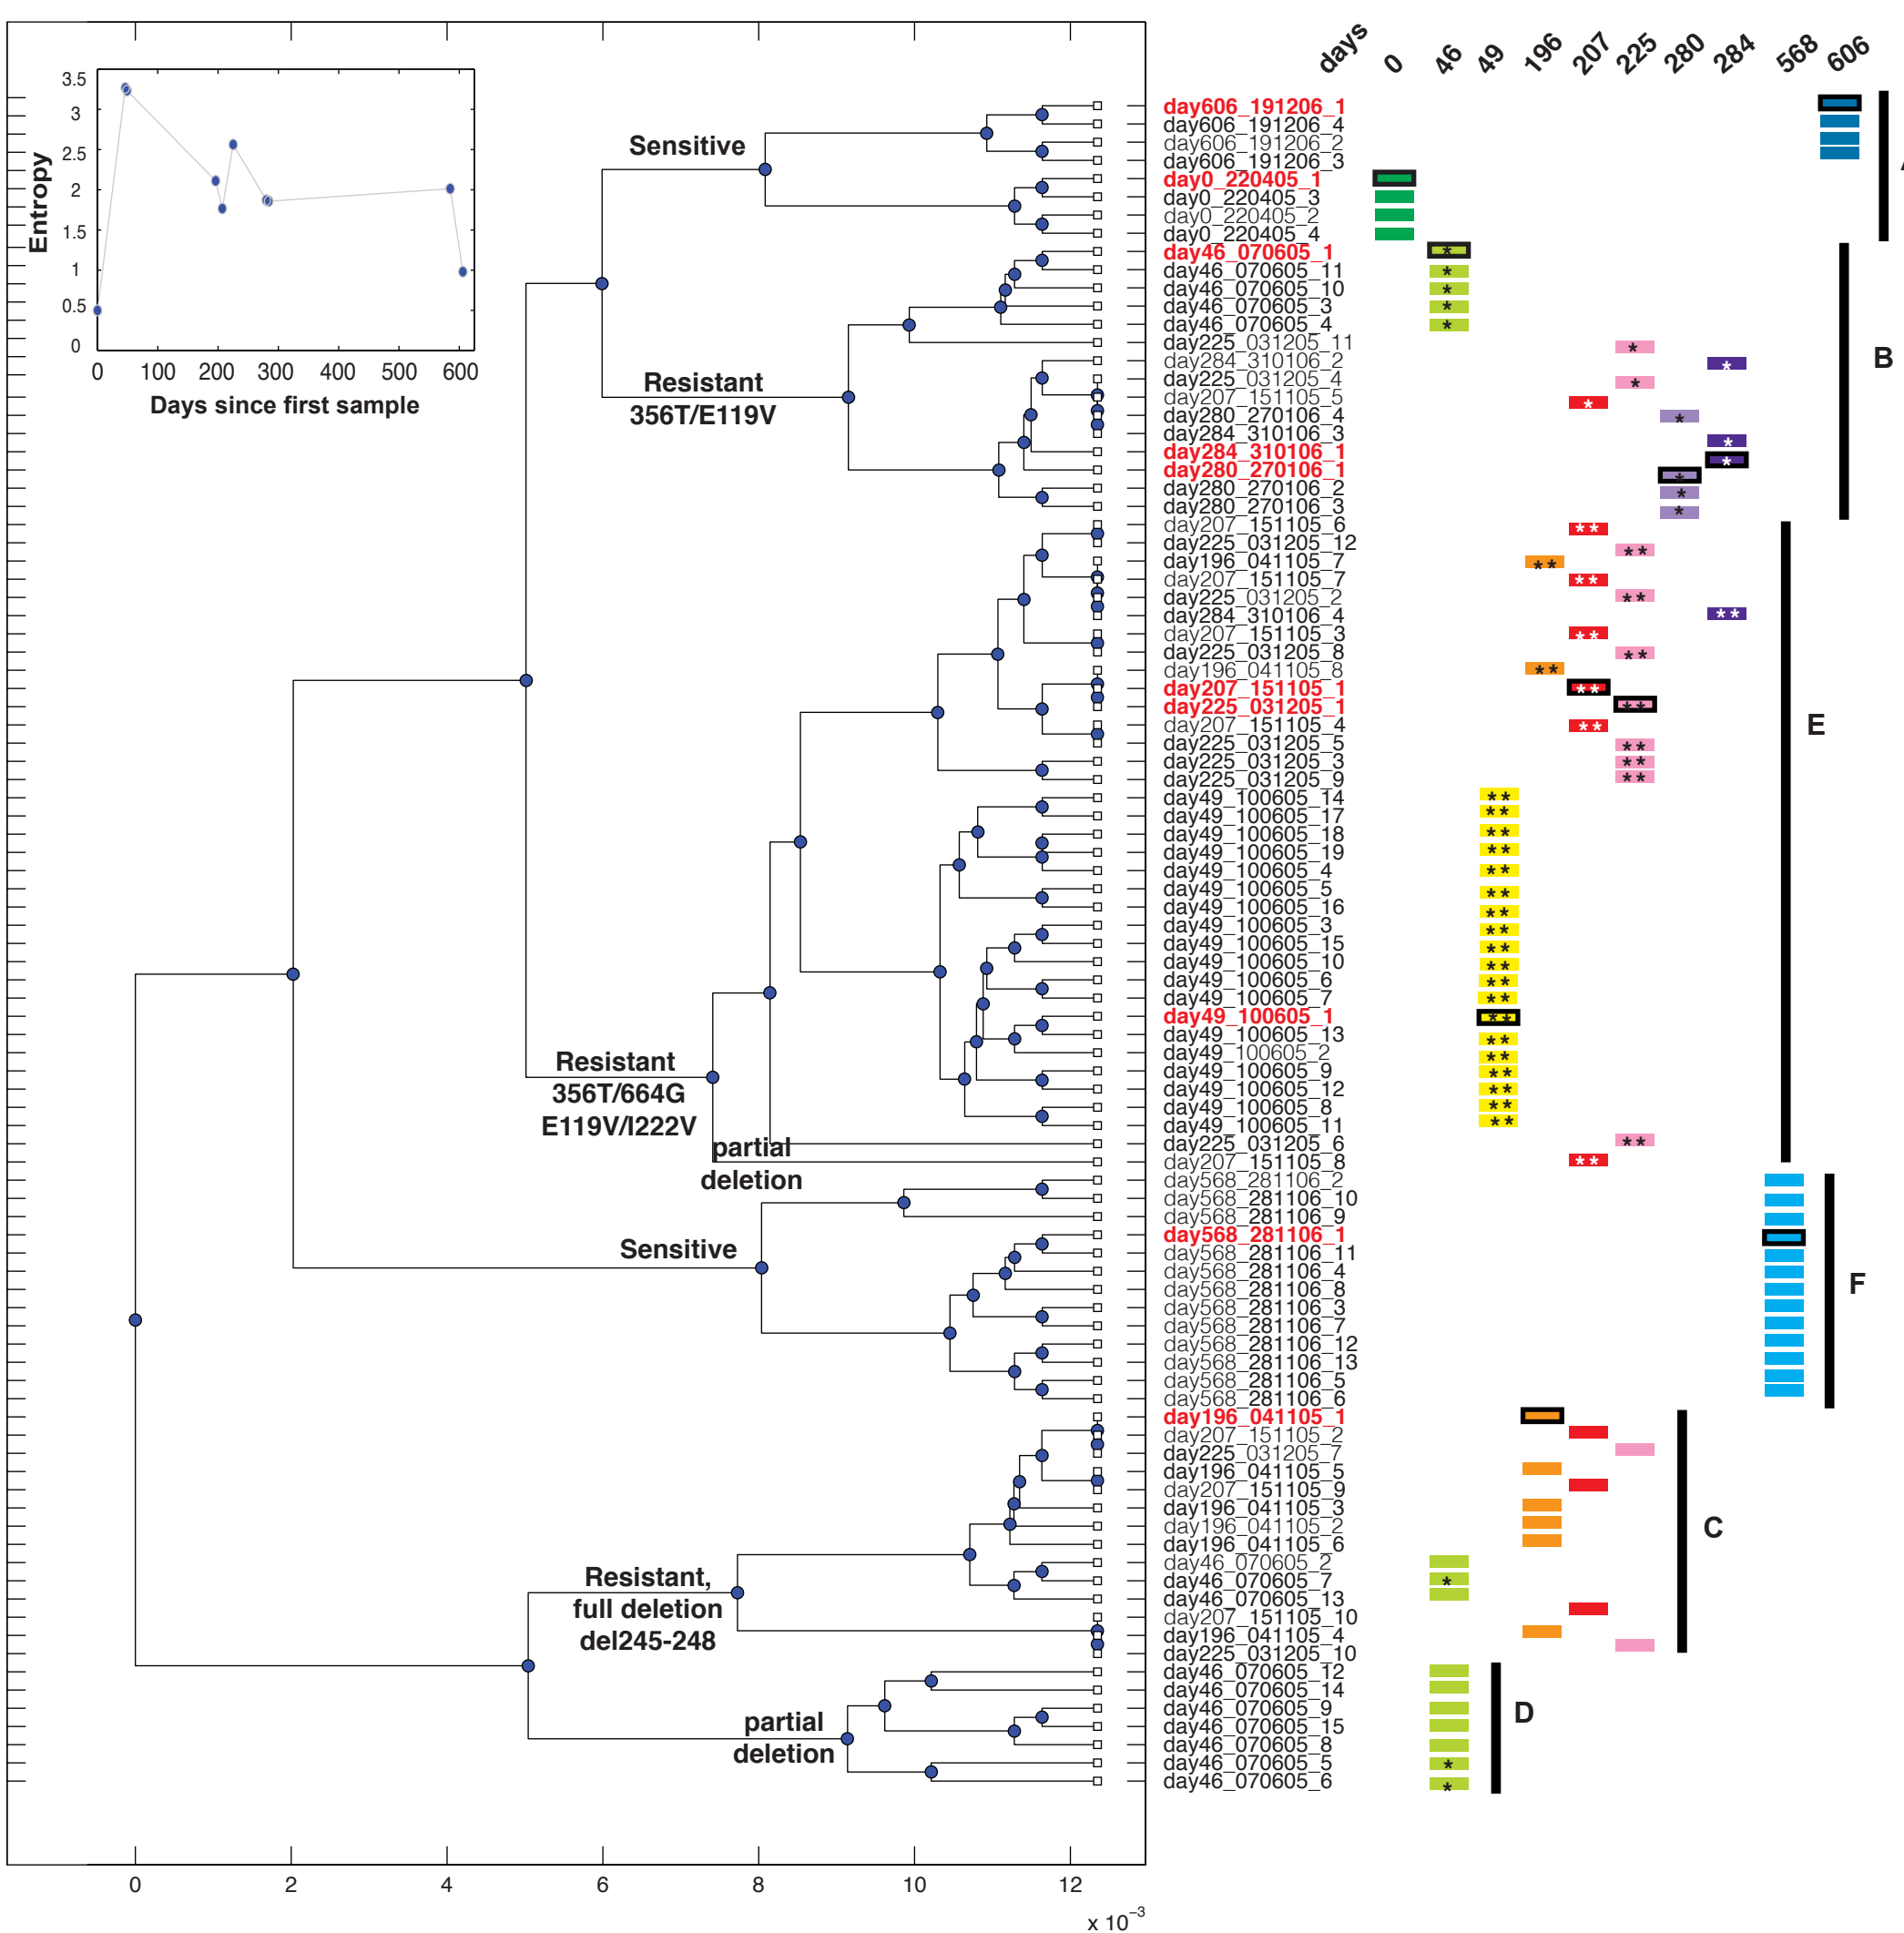

NP

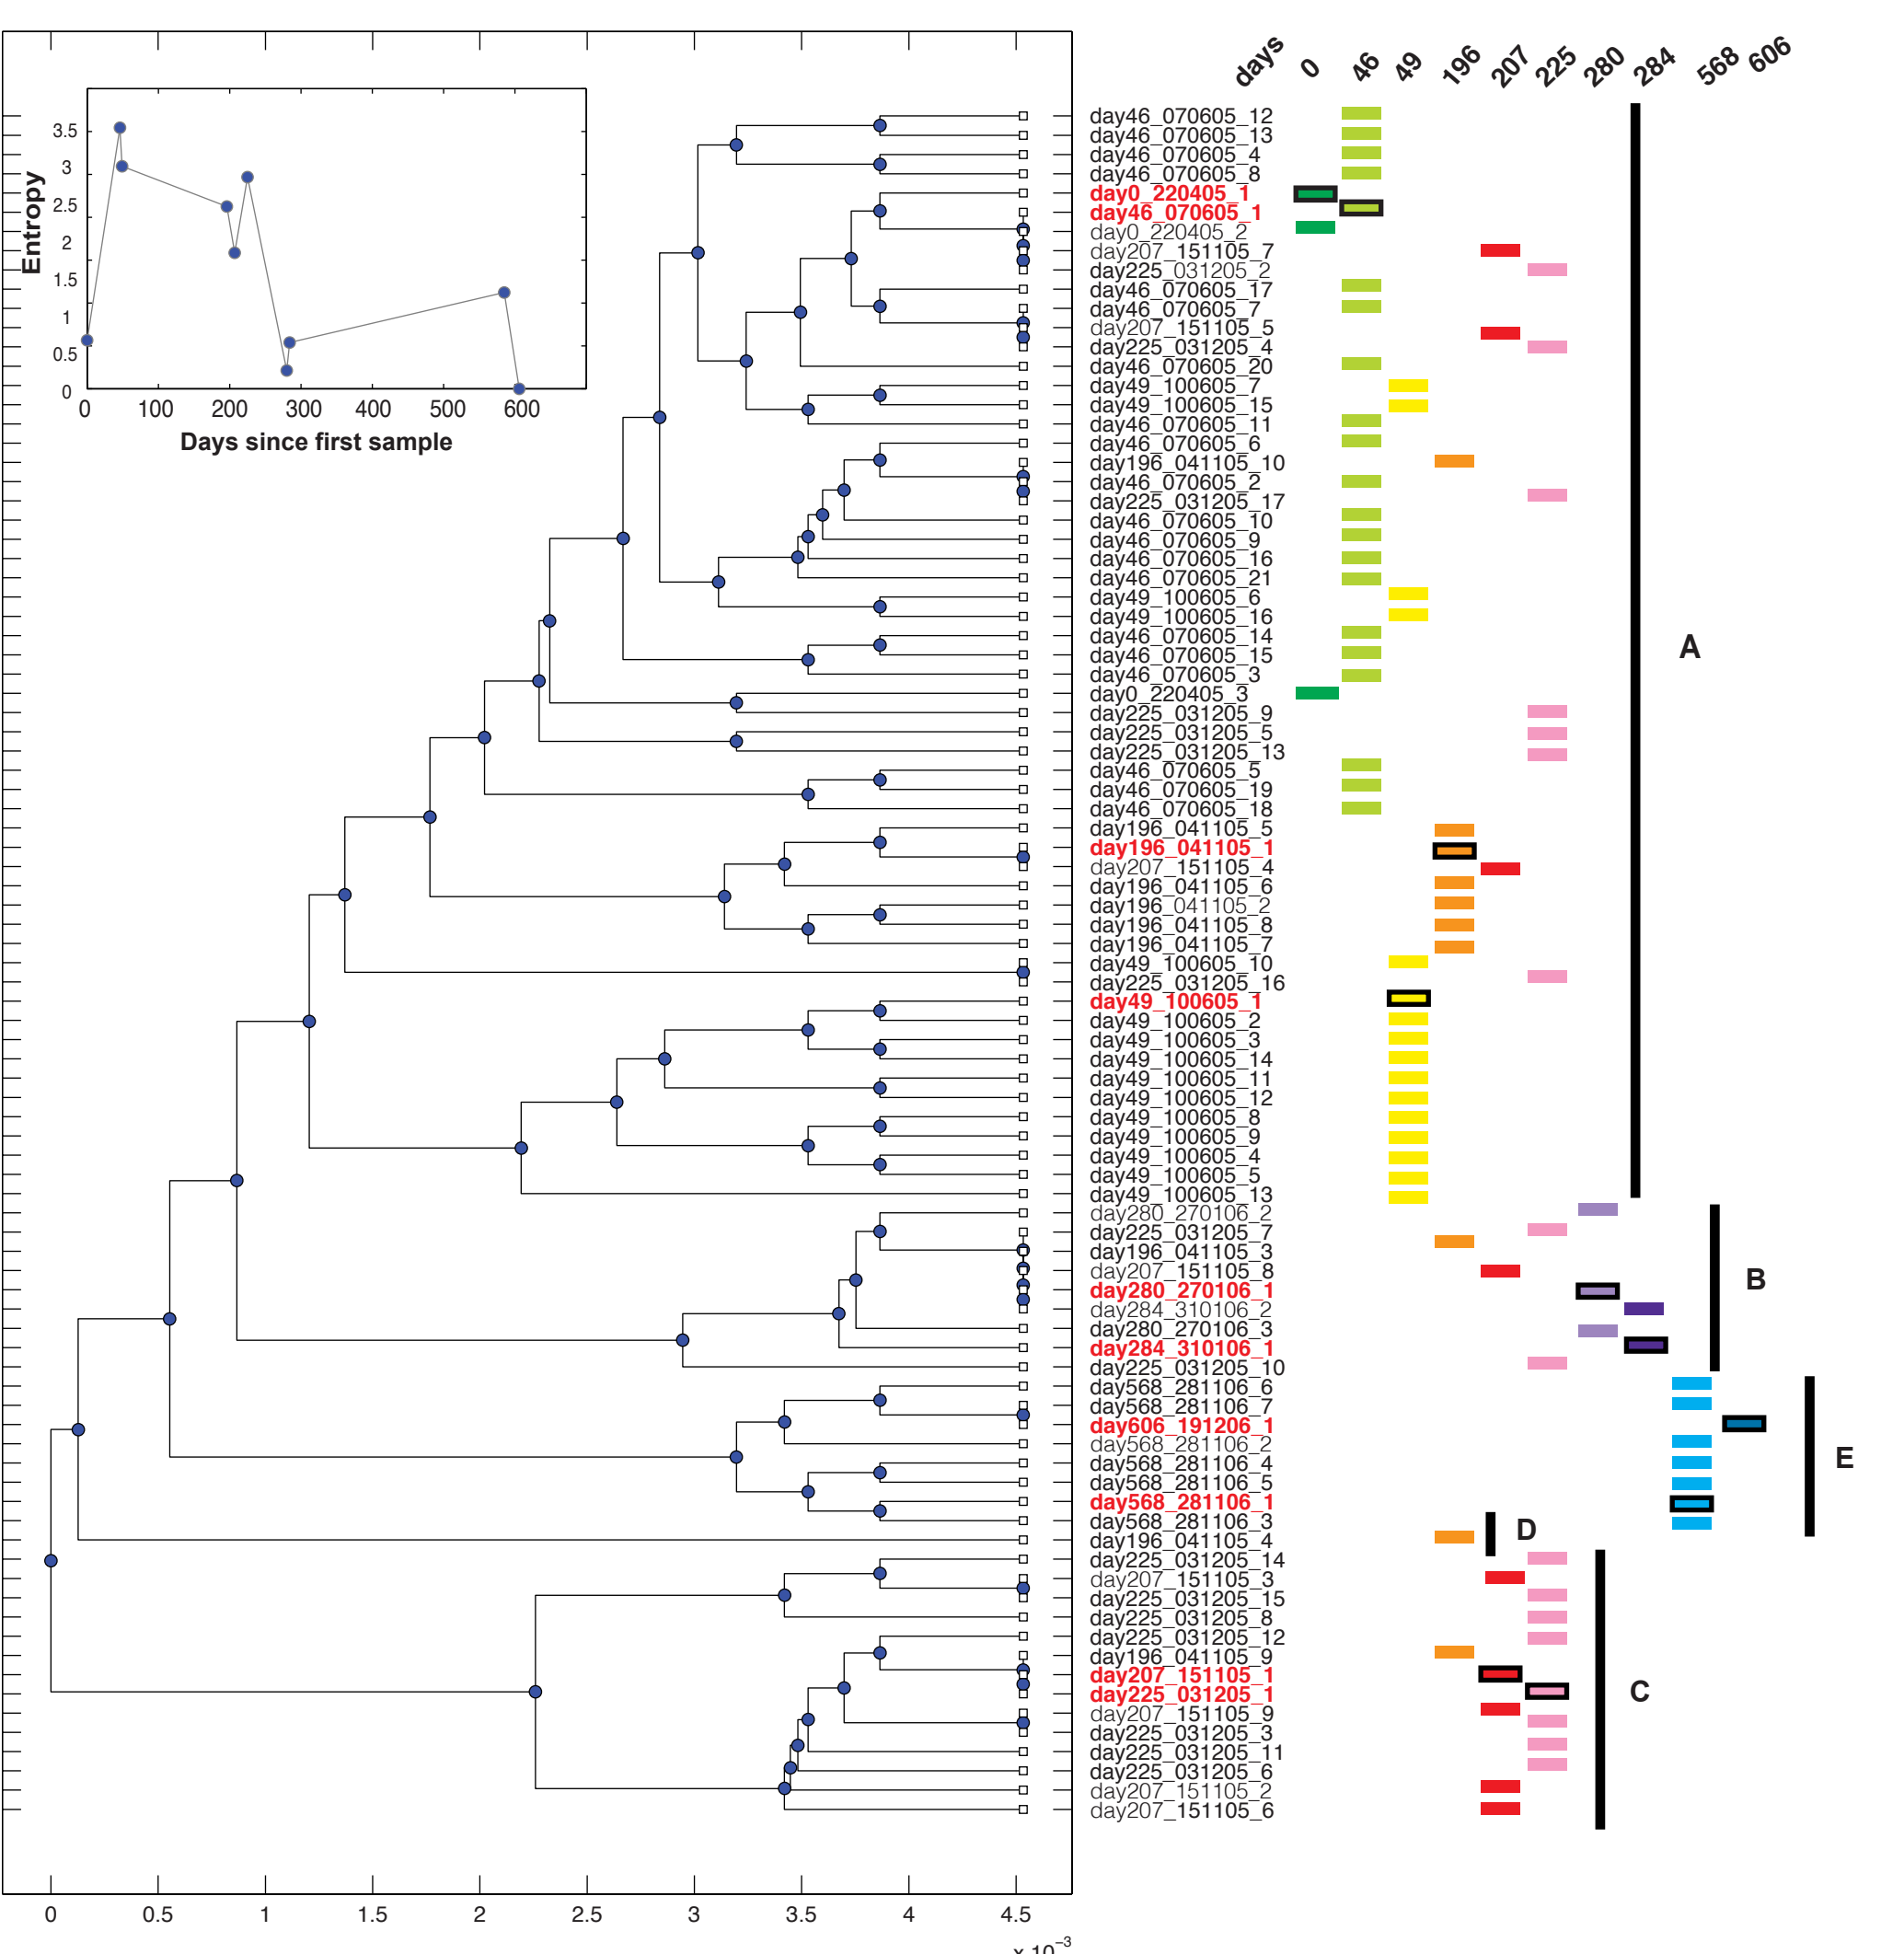

Supplement: mbo002152270sf3.pdf [file mbo002152270sf3.pdf]
